# Supplementary material for: Genotype-Independent Transformation and Genome Editing of Brassica napus Using a Novel Explant Material
Source: Front Plant Sci. 2020 Oct 8;11:579524. doi: 10.3389/fpls.2020.579524 (PMC7578431; doi:10.3389/fpls.2020.579524)
Supplement: Supplementary file 4 [file Table_2.xlsx]

## Sheet: Table 2 Component
Supplementary Table S2: Description of vector components
Component type	Label	Description	References
Promoter, introns and 5’sequences	GM-EF1A2PRO/5'UTR/INTRON1	Putative promoter 5'UTR and intron of a soybean elongation factor EF1A homolog PSO333268.	Corteva Agriscience™, unpublished
	AT-U6-26	AT-U6-26 is an Arabidopsis U6 snRNA gene polymerase III promoter	pICSL01009::AtU6p (Addgene plasmid # 46968)
	GM-UBQ PRO/5'UTR/INTRON1	Putative promoter, 5'UTR and intron of a soybean hexameric polyubiquitin PSO333229	Corteva Agriscience™, unpublished
	AT-UBIQ10 PRO/5'UTR/INTRON1	Arabidopsis Ubiquitin 10 promoter, 5'UTR and intron	[1]
Terminator and 3' Sequences	ST-LS1 INTRON2	POTATO LS1 INTRON 2	[2]
	UBQ3	Ubiquitin-3 (UBQ3) 3'UTR and terminator from Arabidopsis Thaliana	Corteva Agriscience™, unpublished
	GM-U6	Soybean U6 snRNA gene polymerase III terminator	Corteva Agriscience™, unpublished
	UBQ14	Ubiquitin-14 (UBQ14) 3'UTR and terminator from Arabidopsis thaliana	Corteva Agriscience™, unpublished
	UBQ10	Ubiquitin-10 (UBQ10) 3'UTR and terminator from Arabidopsis thaliana	Corteva Agriscience™, unpublished
Coding sequences	Wus	Wuschel ortholog from Helianthus annuus	Corteva Agriscience™, unpublished
	Zsyellow	The Zs-Yellow1 N1 gene encoding a yellow fluorescent protein from Zoanthus sp.	[3]
	Dsred	The red fluorescent protein (DSRED) derived from Discosoma spp., from Clontech	[3]
	SPCN	Spectinomycin	Genebank protein ID - AAD50455.1.
	CAS9 EXON1	First 375 bps of soy codon optimized CAS9 gene from Streptococcus pyogenes	[4]
	CAS9 EXON2	Last 3732 bps exon 2 of soy codon optimized CAS9 gene from Streptococcus pyogenes	[4]
	TAGRFP	Monomeric red fluorescent protein generated from wild-type RFP from sea anemone Entacmaea quadricolor	[5]
	AT-NLS	Arabidopsis gene encoding peptide PKKKRKV that is a nuclear localization signal;	At3g04980 (amino acid 3118-324)
	VIRD2 NLS	Canola cotton optimized C-terminal nuclear localization signal from VirD2 Agrobacterium tumefaciens	[6]
1	Norris, S.R., S.E. Meyer, and J. Callis, The Intron of Arabidopsis-Thaliana Polyubiquitin Genes Is Conserved in Location and Is a Quantitative Determinant of Chimeric Gene-Expression. Plant Molecular Biology, 1993. 21(5): p. 895-906.
2	An, G., et al., Functional analysis of the 3' control region of the potato wound-inducible proteinase inhibitor II gene. Plant Cell, 1989. 1(1): p. 115-22.
3	Matz, M.V., et al., Fluorescent proteins from nonbioluminescent Anthozoa species. Nat Biotechnol, 1999. 17(10): p. 969-73.
4	Jinek, M., et al., A programmable dual-RNA–guided DNA Endonuclease in adaptive bacterial immunity. Science., 2012. 337.
5	Merzlyak, E.M., et al., Bright monomeric red fluorescent protein with an extended fluorescence lifetime. Nat Methods, 2007. 4(7): p. 555-7.
6	Mysore, K.S., et al., Role of the Agrobacterium tumefaciens VirD2 protein in T-DNA transfer and integration. Mol Plant Microbe Interact, 1998. 11(7): p. 668-83.
